# Supplementary material for: Transcriptomes of parents identify parenting strategies and sexual conflict in a subsocial beetle
Source: PubMed Central journal article supplement (PMC4598741; doi:10.1038/ncomms9449), 2015-09-29
Supplement: ncomms9449-s1.pdf [file ncomms9449-s1.pdf]

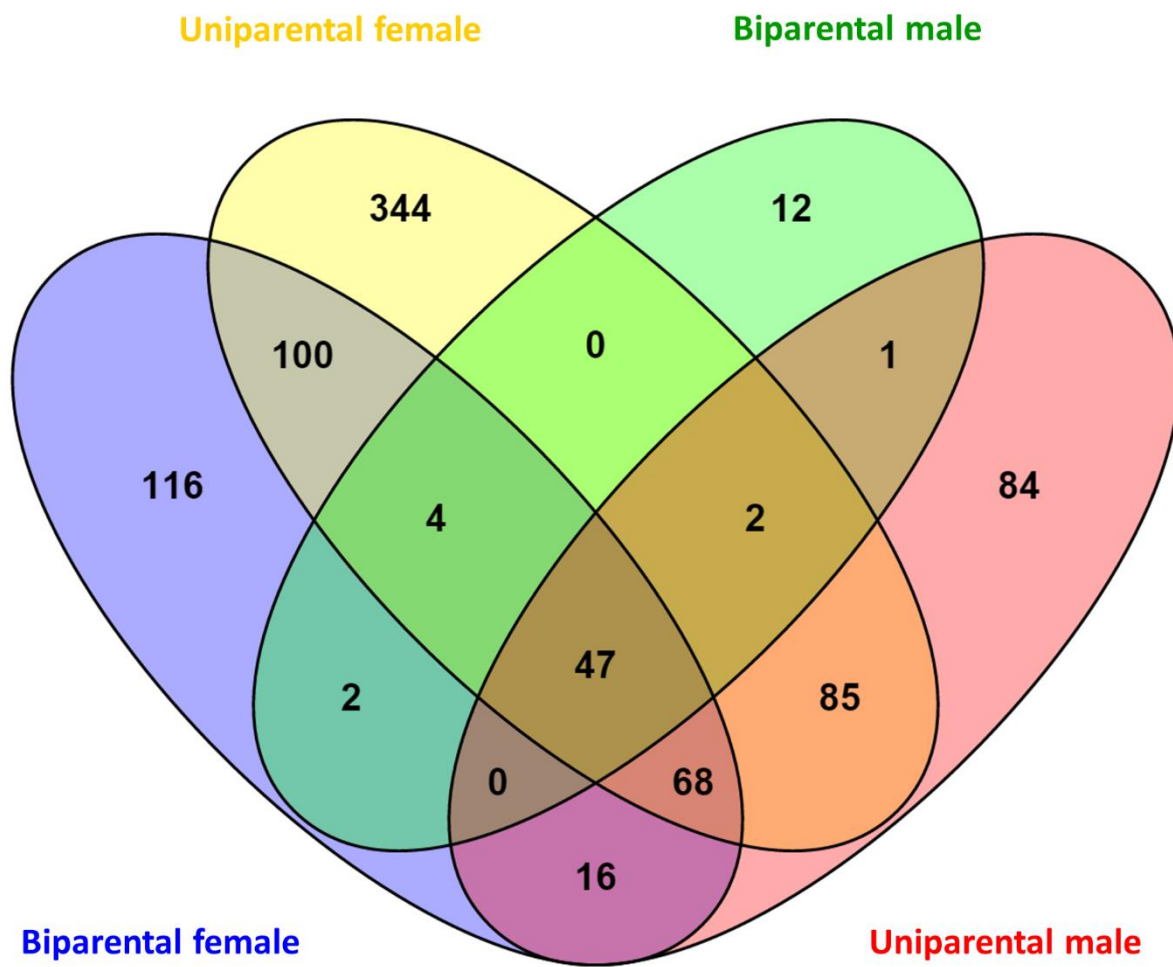

**Supplementary Figure 1** | The number of differentially expressed genes for uniparental males (green), uniparental females (yellow), biparental males (red), and biparental females (blue) in caring vs. control comparisons in the caring gene set and the numbers shared between each of these (the overlap regions). Note only genes that were DE in the same direction were included in the regions of overlap.

Uniparental female

Biparental male

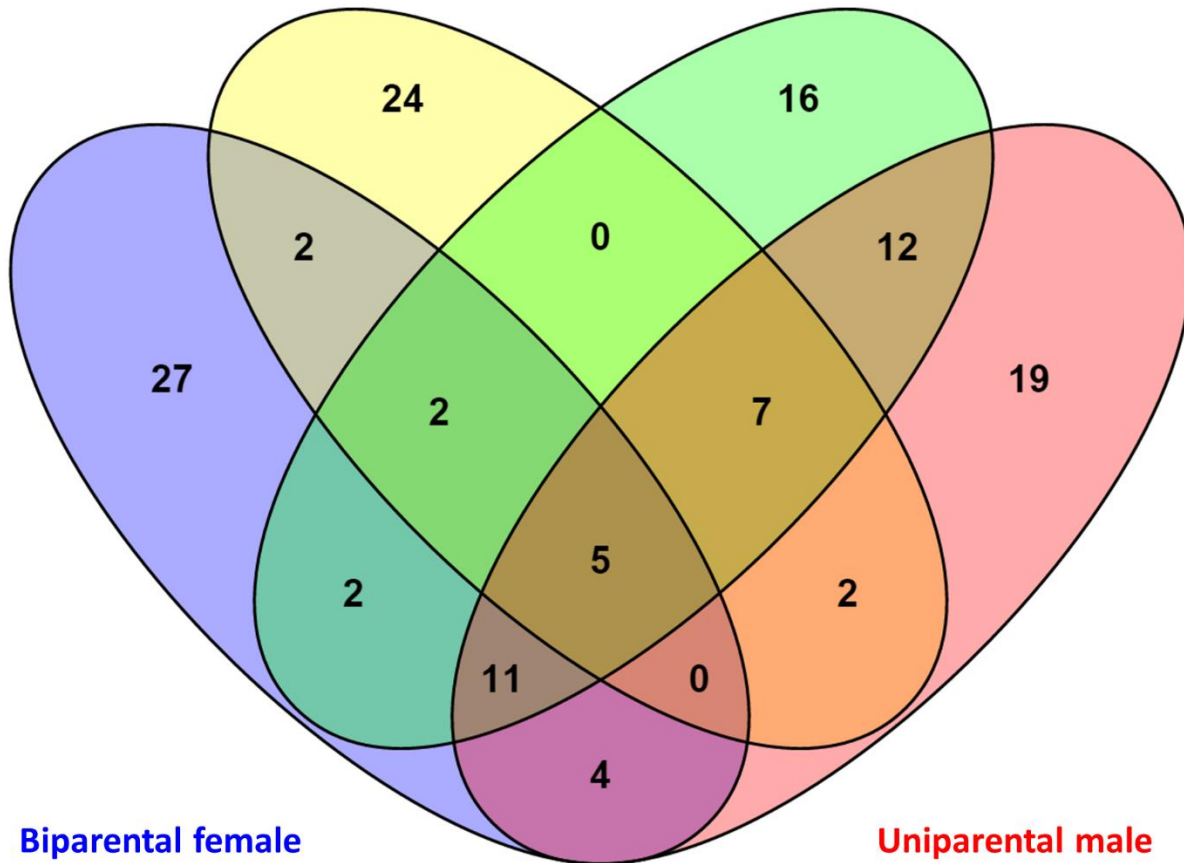

**Supplementary Figure 2** | The number of differentially expressed genes for uniparental males (green), uniparental females (yellow), biparental males (red), and biparental females (blue) in post-caring vs. control comparisons in the caring gene set and the numbers shared between each of these (the overlap regions). Note only genes that were DE in the same direction were included in the regions of overlap.

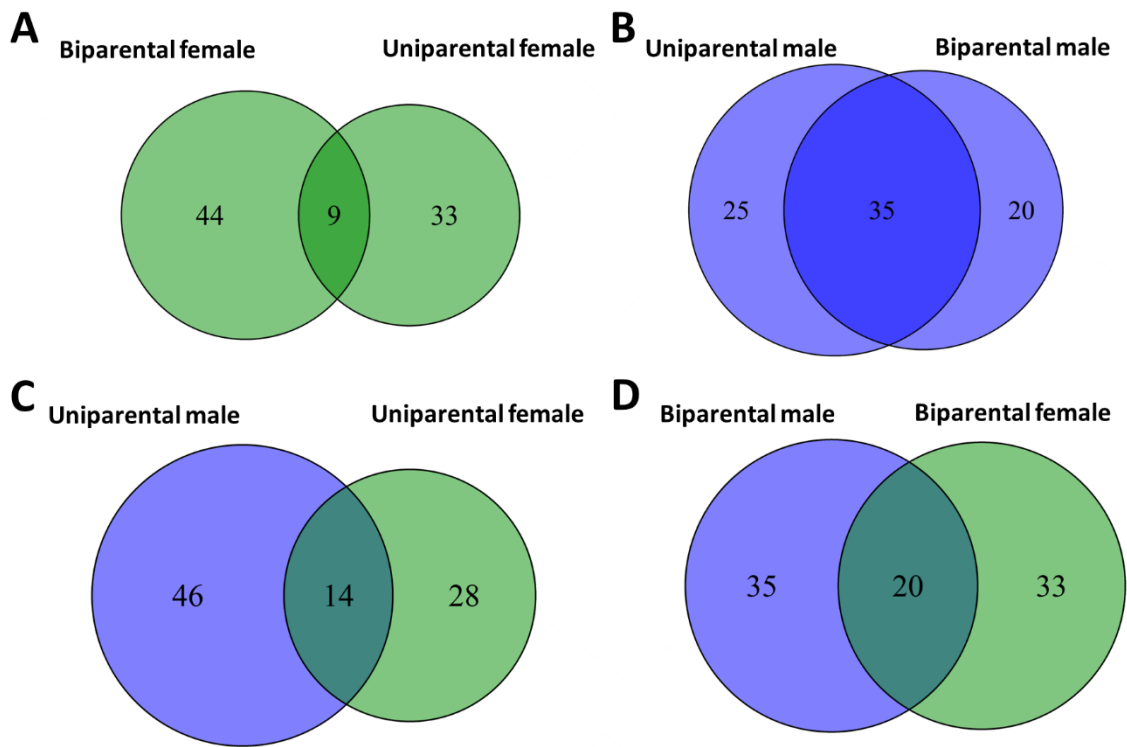

**Supplementary Figure 3** | The number of differentially expressed genes in post-caring vs. control comparisons and the numbers shared (in the overlap) for: A. biparental females and uniparental females, B. uniparental males and biparental males, C. uniparental males and uniparental females, and D. biparental males and biparental females. Note only genes that were DE in the same direction were included in the regions of overlap.

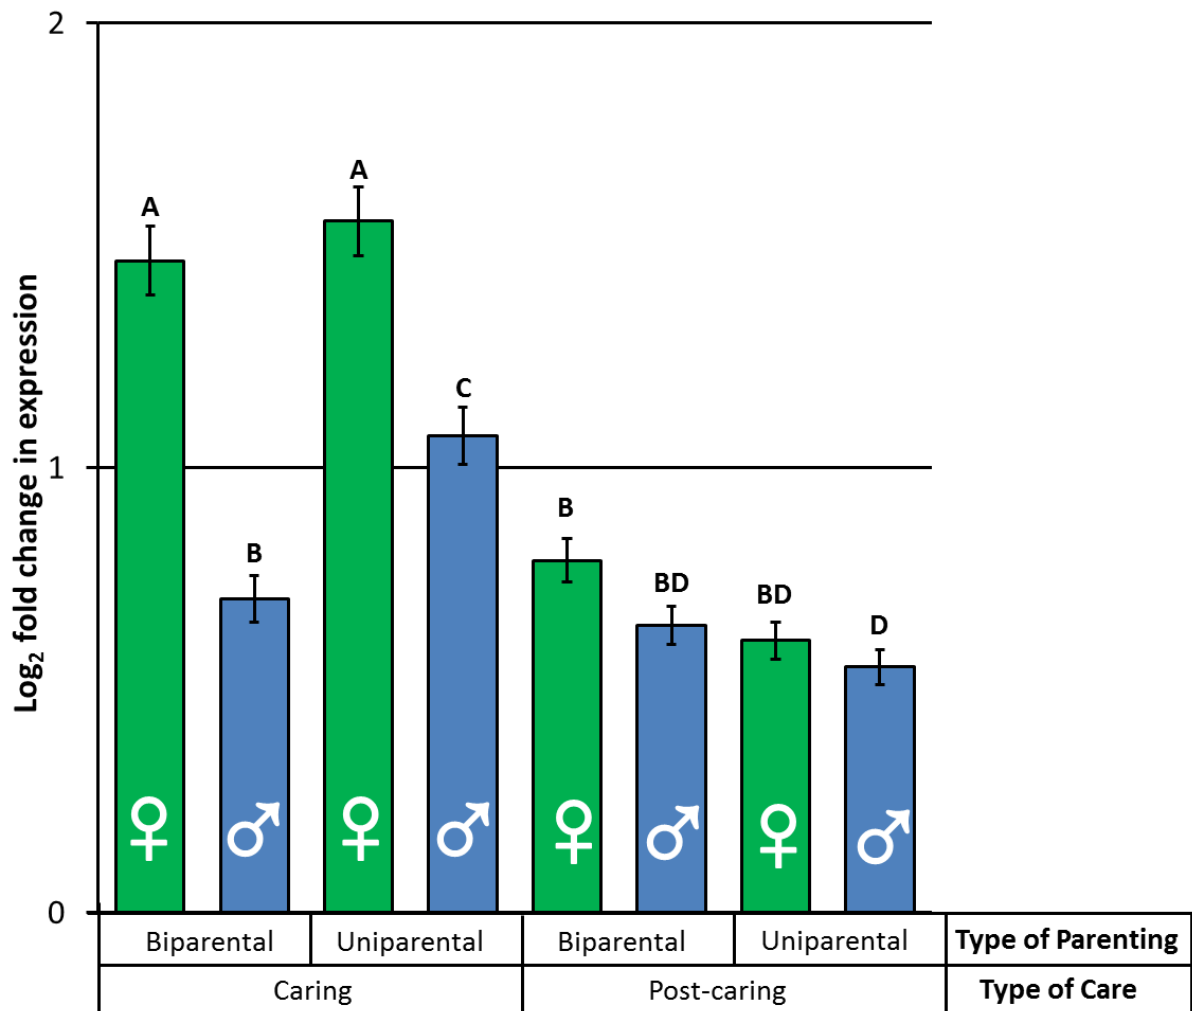

Supplementary Figure 4 | Change of gene expression in the caring gene set under different forms of parental care when using the “extended reference assembly”.

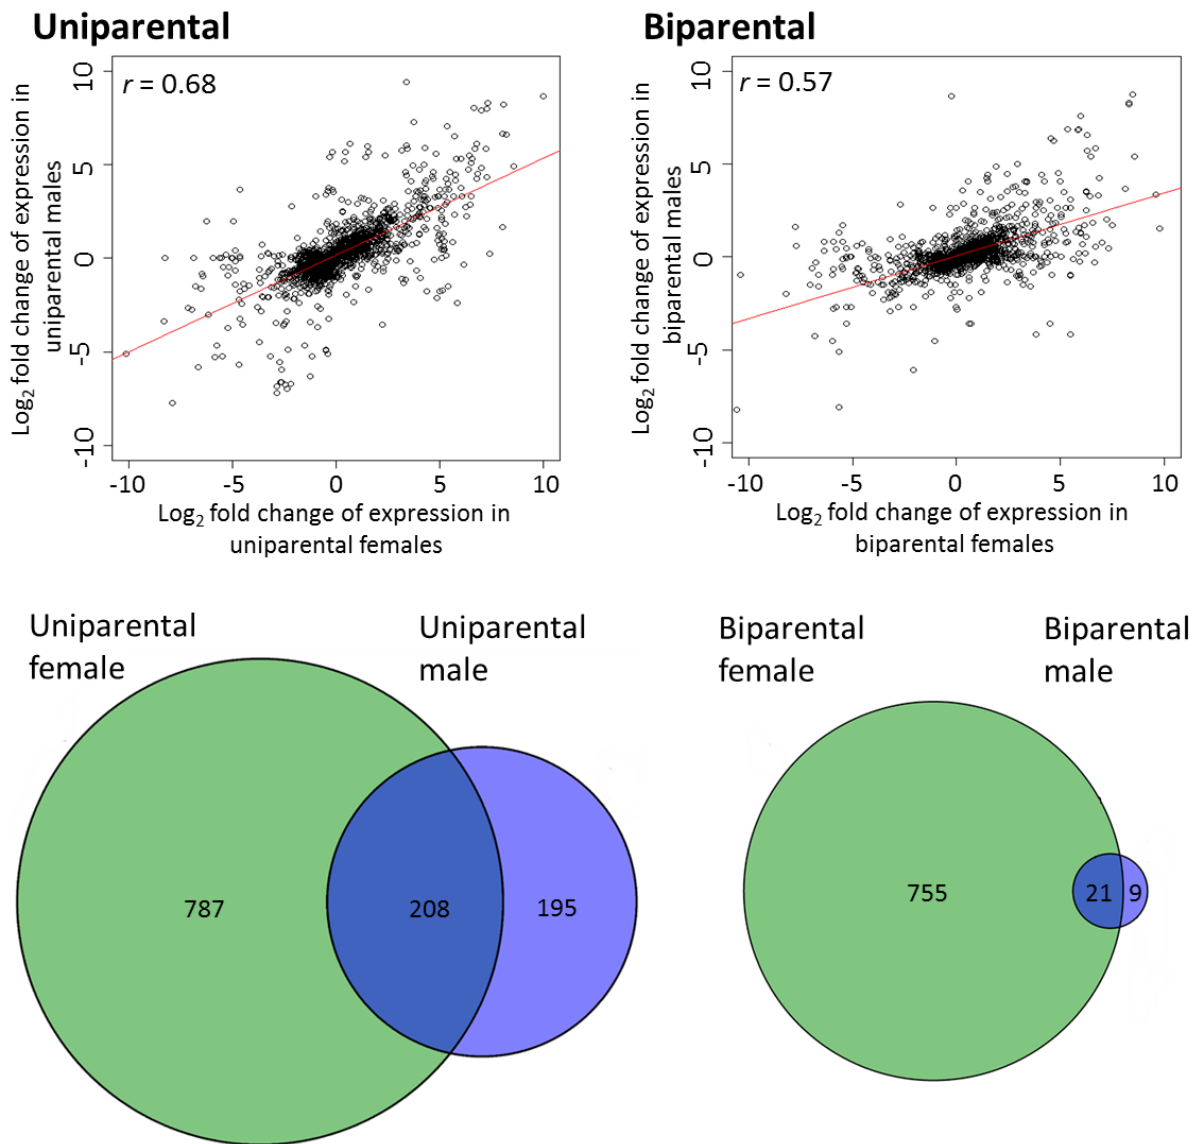

**Supplementary Figure 5 | Correlation between gene expression under uniparental and biparental care when using the “extended reference assembly”. (a)** Correlation of expression change in caring vs. control comparisons in the caring gene set for each sex in uniparental and biparental conditions. **(b)** The number of differentially expressed genes in caring vs. control comparisons for uniparental and biparental treatments and the number shared by females and males (yellow areas).

### Females

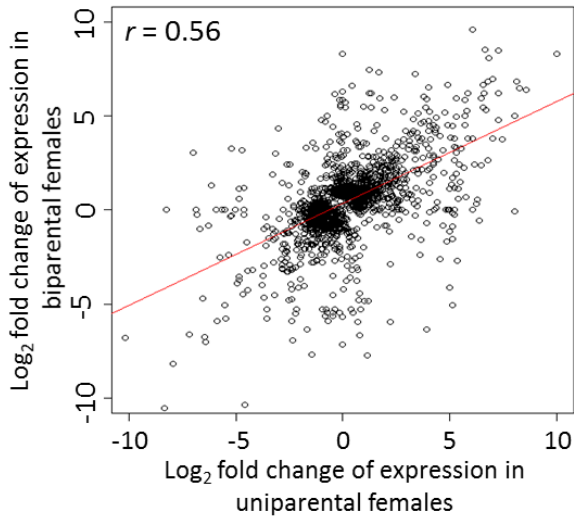

### Males

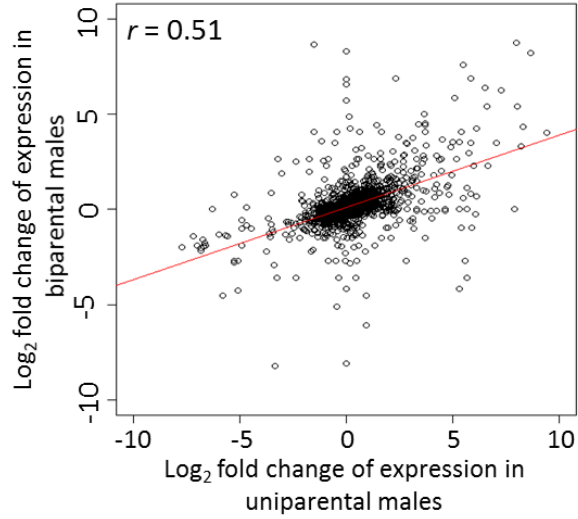

Uniparental female

Biparental female

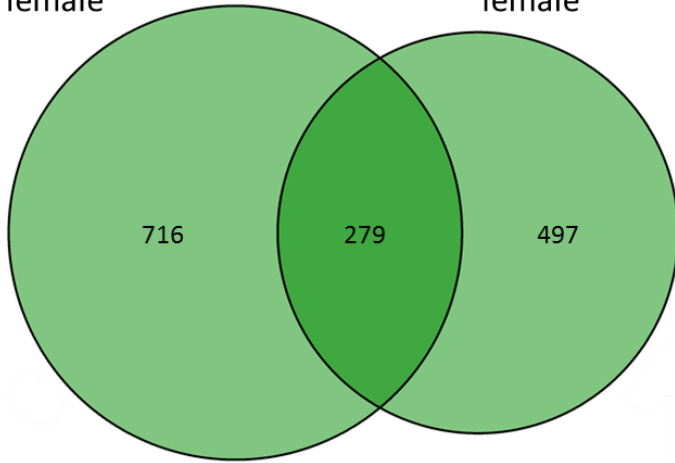

Uniparental male

Biparental male

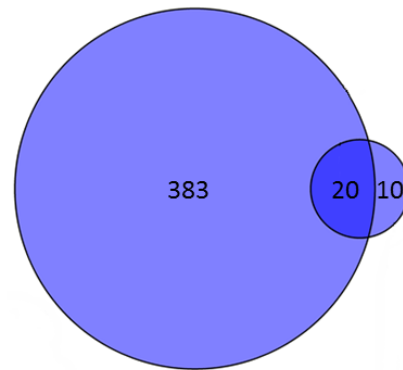

**Supplementary Figure 6 | Correlation between gene expression under male and female parental care when using the “extended reference assembly”. (a)** Correlation of male and female gene expression change in caring vs. control comparisons in the caring gene set in uniparental and biparental conditions. **(b)** The number of differentially expressed genes for males and female in caring vs. control comparisons in the caring gene set and the number shared in uniparental or biparental conditions (yellow areas).

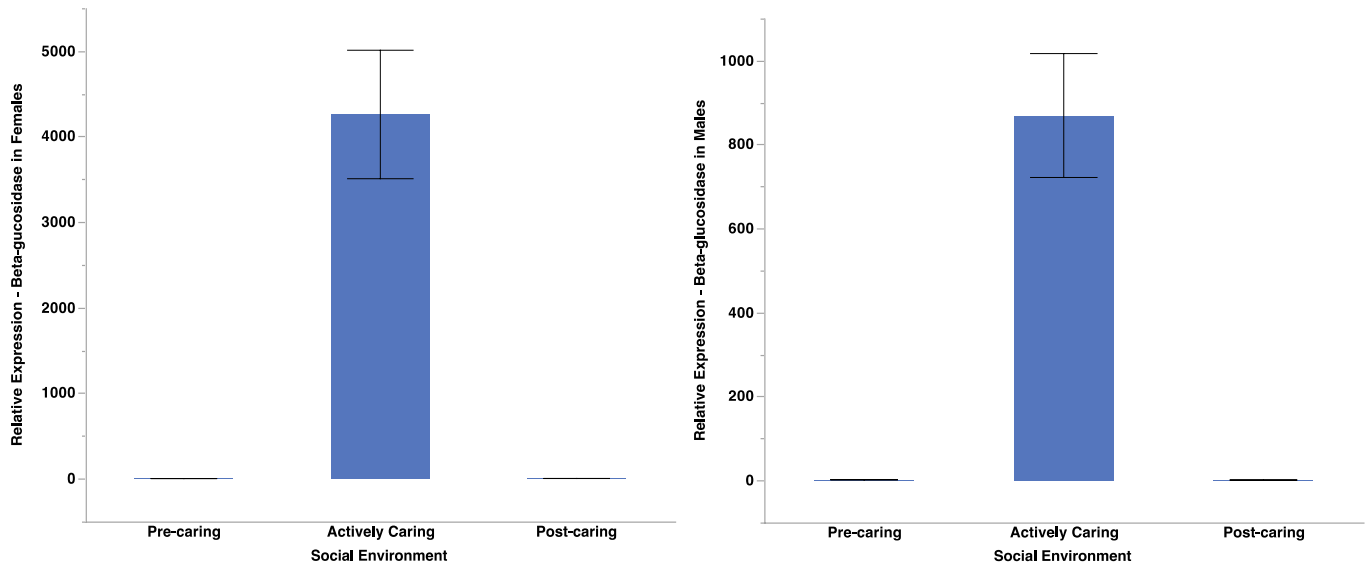

**Supplementary Figure 7** | Relative expression of  $\beta$ -glucosidase under three behavioural stages – pre-caring (control, mated but not on a mouse); actively caring; post-caring (24 h after dispersal from the carcass by the caring female) in head tissue from **A**) uniparental female *Nicrophorus vespilloides*. The relative expression is so much lower in pre-caring (mean = 1.56) and post-caring (mean = 2.45) states that it does not register on this graph, but it was measurable in our samples. ANOVA  $F=424.433$ ,  $df = 2,27$ ,  $P < 0.0001$ . Significance of pair-wise comparisons assessed by Fisher's LSD test: Pre-caring < Actively caring,  $P < 0.0001$ ; Pre-caring < Post-caring,  $P = 0.025$ ; Post-caring < Actively caring,  $P < 0.0001$ . **B**) uniparental male *N. vespilloides*. The relative expression is so much lower in pre-caring (mean = 1.61) and post-caring (mean = 0.95) states that it does not register on this graph, but it was measurable in our samples. ANOVA  $F= 310.175$ ,  $df = 2,26$ ,  $P < 0.0001$ . Significance of pair-wise comparisons assessed by Fisher's LSD test: Pre-caring < Actively caring,  $P < 0.0001$ ; Pre-caring NS Post-caring,  $P = 0.534$ ; Post-caring < Actively caring,  $P < 0.0001$ . In all samples, analyses performed on ln-transformed data ( $-\Delta\Delta C_T$ ). TATA-binding protein was used as an endogenous control, with 3 technical replicates and 10 biological replicates per gene and treatment. One of the replicates failed in the pre-caring stage, so there were only 9 biological replicates. The pre-caring state was used as the baseline expression state.

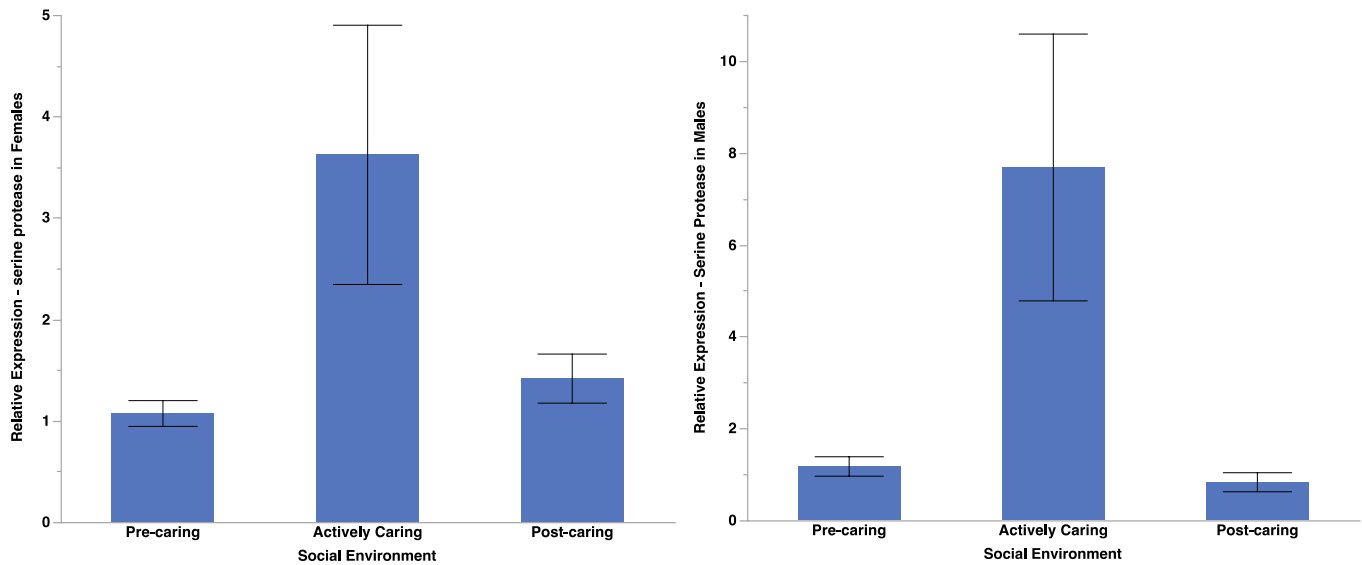

**Supplementary Figure 8** | Relative expression of *serine protease* under three behavioural stages – pre-caring (control, mated but not on a mouse); actively caring; post-caring (24 h after dispersal from the carcass by the caring female) in head tissue from **A**) uniparental female *Nicrophorus vespilloides*. ANOVA  $F = 4.119$ ,  $df = 2,27$ ,  $P = 0.024$ . Significance of pair-wise comparisons assessed by Fisher's LSD test: Pre-caring < Actively caring,  $P = 0.0092$ ; Pre-caring N.S. Post-caring,  $P = 0.510$ ; Post-caring < Actively caring,  $P = 0.042$ . **B**) from uniparental male *N. vespilloides*. ANOVA  $F = 18.152$ ,  $df = 2,26$ ,  $P = 0.0002$ . Significance of pair-wise comparisons assessed by Fisher's LSD test: Pre-caring < Actively caring,  $P = 0.0015$ ; Pre-caring N.S. Post-caring,  $P = 0.359$ ; Post-caring < Actively caring,  $P < 0.0001$ . Analyses performed on ln-transformed data ( $-\Delta\Delta C_T$ ). TATA-binding protein was used as an endogenous control, with 3 technical replicates and 10 biological replicates per gene and treatment. One of the replicates failed in the pre-caring stage, so there were only 9 biological replicates. The pre-caring state was used as the baseline expression state.



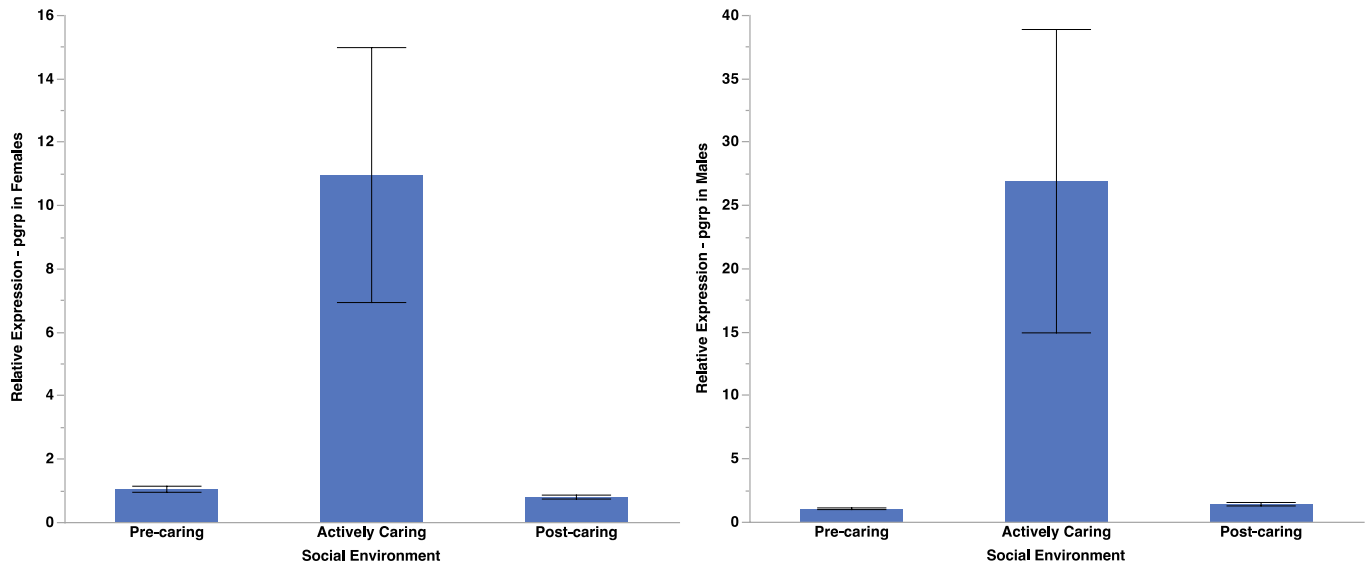

**Supplementary Figure 9** | Relative expression of *peptidoglycan recognition protein (pgrp)* under three behavioural stages – pre-caring (control, mated but not on a mouse); actively caring; post-caring (24 h after dispersal from the carcass by the caring female) in head tissue from uniparental female *Nicrophorus vespilloides*. ANOVA  $F=28.350$ ,  $df = 2,27$ ,  $P < 0.0001$ . Significance of pair-wise comparisons assessed by Fisher's LSD test: Pre-caring < Actively caring,  $P < 0.0001$ ; Pre-caring NS Post-caring,  $P = 0.388$ ; Post-caring < Actively caring,  $P < 0.0001$ . **B**) in head tissue from uniparental male *N. vespilloides*. ANOVA  $F=36.790$ ,  $df = 2,26$ ,  $P < 0.0001$ . Significance of pair-wise comparisons assessed by Fisher's LSD test: Pre-caring < Actively caring,  $P < 0.0001$ ; Pre-caring NS Post-caring,  $P = 0.518$ ; Post-caring < Actively caring,  $P < 0.0001$ . Analyses performed on ln-transformed data ( $-\Delta\Delta C_T$ ). TATA-binding protein was used as an endogenous control, with 3 technical replicates and 10 biological replicates per gene and treatment. One of the replicates failed in the pre-caring stage, so there were only 9 biological replicates. The pre-caring state was used as the baseline expression state.

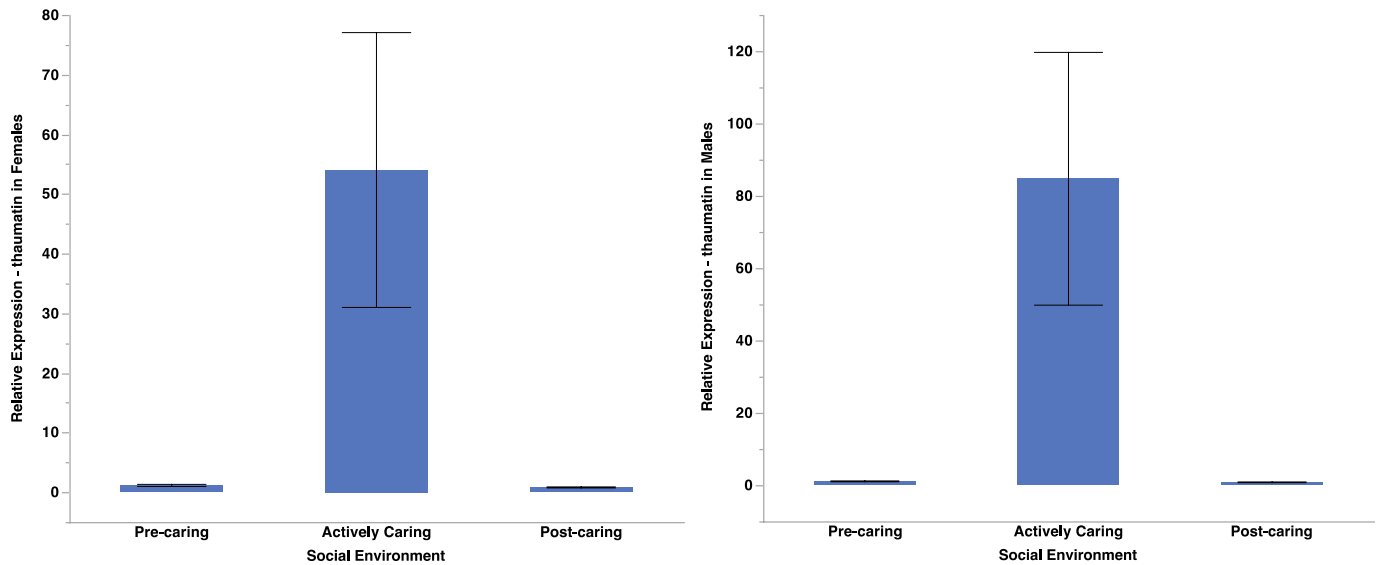

**Supplementary Figure 10** | Relative expression of *thaumatin* under three behavioural stages – pre-caring (control, mated but not on a mouse); actively caring; post-caring (24 h after dispersal from the carcass by the caring female) **A**) in head tissue from uniparental female *Nicrophorus vespilloides*. ANOVA  $F=80.887$ ,  $df = 2,26$ ,  $P < 0.0001$ . Significance of pair-wise comparisons assessed by Fisher's LSD test: Pre-caring < Actively caring,  $P < 0.0001$ ; Pre-caring NS Post-caring,  $P = 0.518$ ; Post-caring < Actively caring,  $P < 0.0001$ . Analyses performed on ln-transformed data ( $-\Delta\Delta C_T$ ). **B**) from uniparental male *Nicrophorus vespilloides*. ANOVA  $F=71.089$ ,  $df = 2,27$ ,  $P < 0.0001$ . Significance of pair-wise comparisons assessed by Fisher's LSD test: Pre-caring < Actively caring,  $P < 0.0001$ ; Pre-caring NS Post-caring,  $P = 0.567$ ; Post-caring < Actively caring,  $P < 0.0001$ . Analyses performed on ln-transformed data ( $-\Delta\Delta C_T$ ). TATA-binding protein was used as an endogenous control, with 3 technical replicates and 10 biological replicates per gene and treatment. The pre-caring state was used as the baseline expression state.

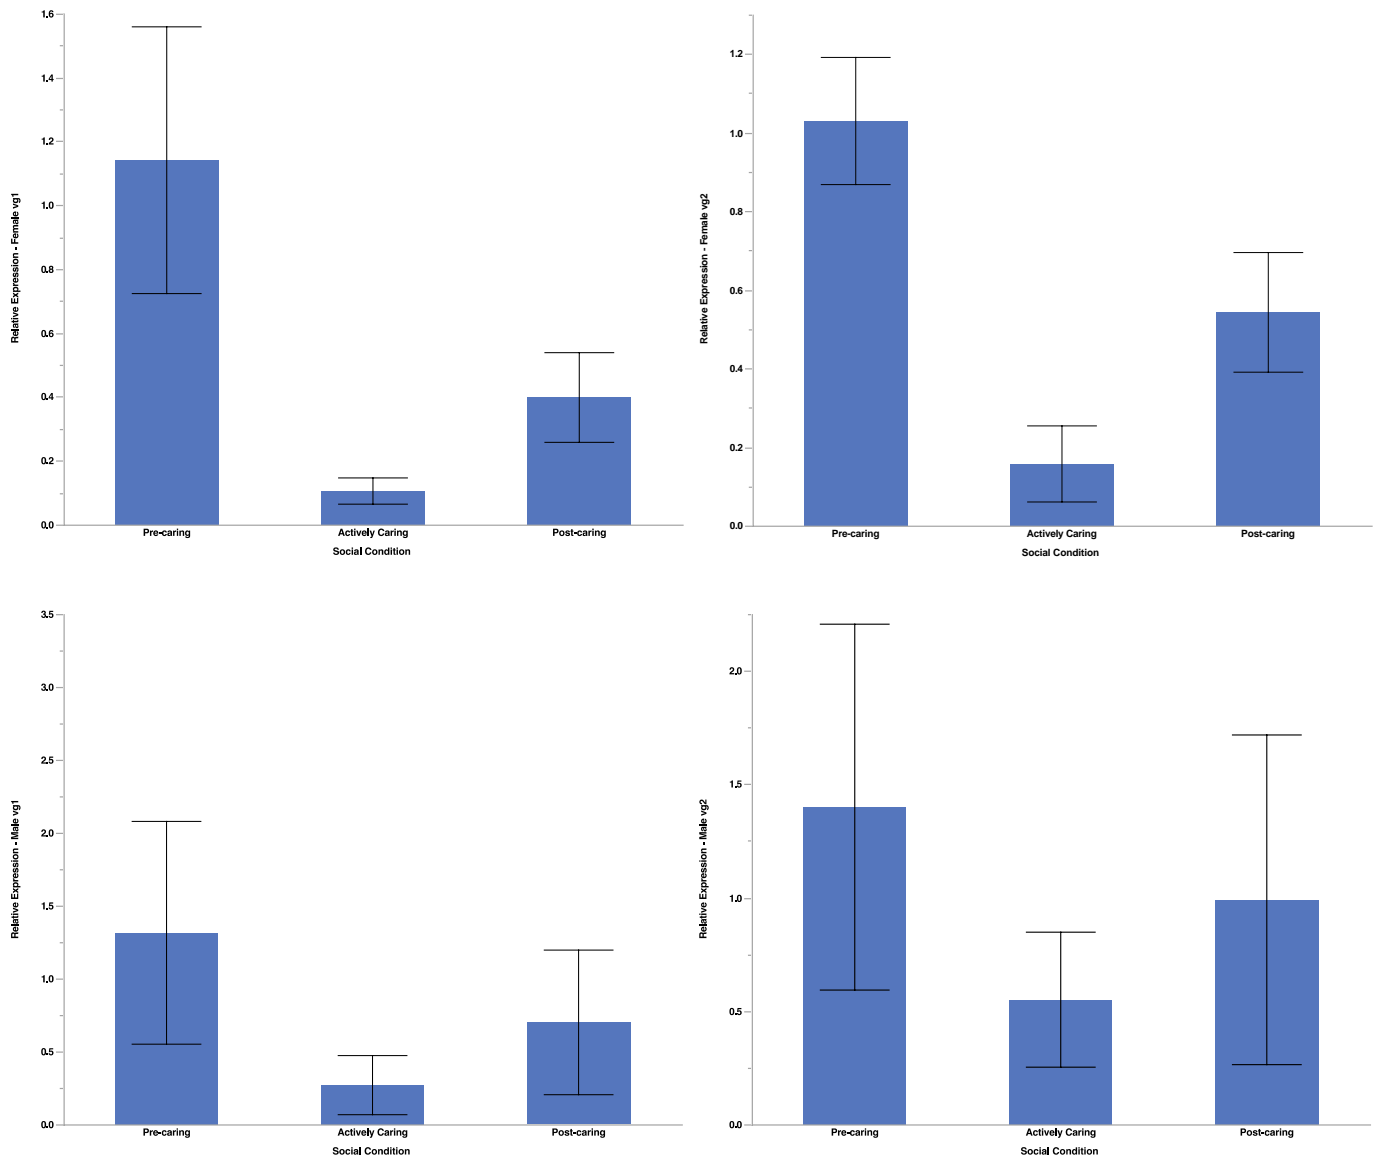

**Supplementary Figure 11** | Relative expression of *vitellogenin 1* (*vg1*)<sup>1</sup> under three behavioural stages – pre-caring (control, mated but not on a mouse); actively caring; post-caring (24 h after dispersal from the carcass by the caring female), measured by qRT-PCR, **A**) in head tissue from uniparental female *Nicrophorus vespilloides*. Data expressed as means  $\pm$  95% CI. ANOVA  $F=42.719$ ,  $df = 2,27$ ,  $P < 0.0001$ . Significance of pair-wise comparisons assessed by Fisher's LSD test: Pre-caring significantly > Actively caring,  $P < 0.0001$ ; Pre-caring significantly > Post-caring,  $P = 0.0005$ ; Post-caring > Actively caring,  $P < 0.0001$ . **B**) in head tissue from uniparental female *Nicrophorus vespilloides*. ANOVA  $F=35.052$ ,  $df = 2,27$ ,  $P < 0.0001$ . Significance of pair-wise comparisons assessed by Fisher's LSD test: Pre-caring > Actively caring,  $P < 0.0001$ ; Pre-caring > Post-caring,  $P = 0.016$ ; Post-caring > Actively caring,  $P < 0.0001$ . Analyses performed on In-transformed data ( $-\Delta\Delta C_T$ ). **C**) in head tissue from uniparental male *N. vespilloides*. ANOVA  $F=8.507$ ,  $df = 2,27$ ,  $P = 0.0014$ . Significance of pair-wise comparisons assessed by Fisher's LSD test: Pre-caring > Actively caring,  $P < 0.0003$ ; Pre-caring NS Post-caring,  $P = 0.110$ ; Post-caring > Actively caring,  $P = 0.021$ . **D**) in head tissue from uniparental male *N. vespilloides*. ANOVA  $F=6.192$ ,  $df = 2,27$ ,  $P = 0.097$ . Significance of pair-wise comparisons assessed by Fisher's LSD test: Pre-caring > Actively caring,  $P = 0.033$ ; Pre-caring NS Post-caring,  $P = 0.358$ ; Post-caring NS Actively caring,  $P = 0.201$ . Analyses performed on In-transformed data ( $-\Delta\Delta C_T$ ). TATA-binding protein was used as an endogenous control, with 3 technical replicates and 10 biological replicates per gene and treatment. The pre-caring state was used as the baseline expression state.

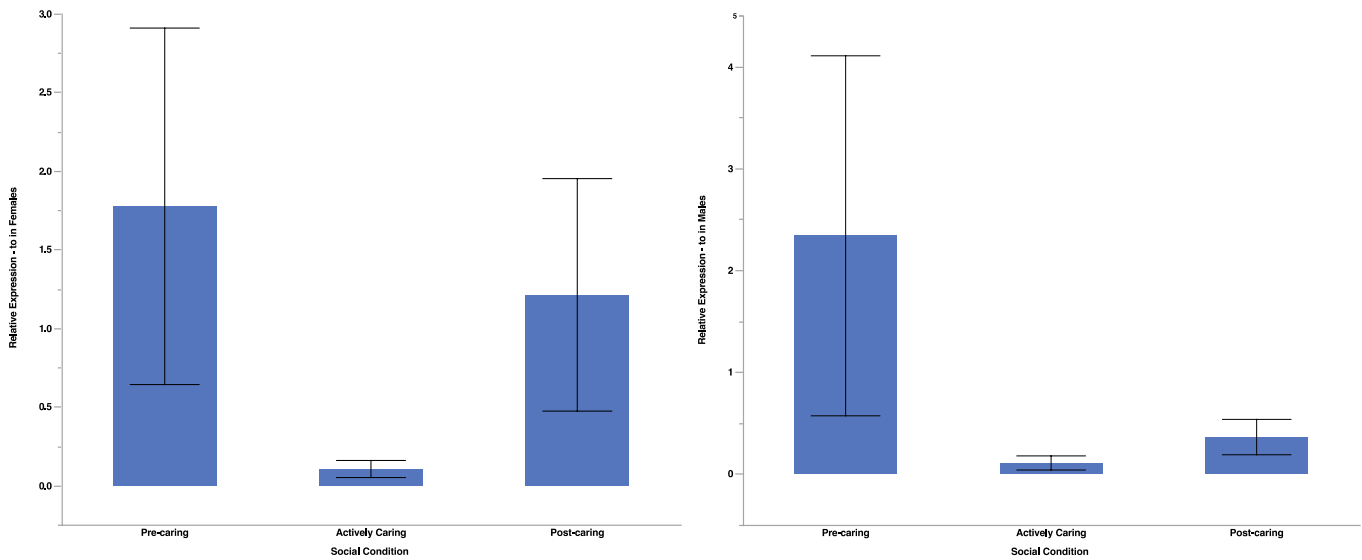

**Supplementary Figure 12a** | Relative expression of *takeout* (*to*) under three behavioural stages – pre-caring (control, mated but not on a mouse); actively caring; post-caring (24 h after dispersal from the carcass by the caring female) in head tissue from **A)** uniparental female *Nicrophorus vespilloides*. ANOVA  $F=22.534$ ,  $df = 2,27$ ,  $P < 0.0001$ . Significance of pair-wise comparisons assessed by Fisher's LSD test: Pre-caring > caring,  $P < 0.0001$ ; Pre-caring NS Post-caring,  $P = 0.826$ ; Post-caring > caring,  $P = 0.0001$ . **B)** from uniparental male *N. vespilloides*. ANOVA  $F=13.325$ ,  $df = 2,27$ ,  $P < 0.0001$ . Significance of pair-wise comparisons assessed by Fisher's LSD test: Pre-caring > caring,  $P < 0.0001$ ; Pre-caring > Post-caring,  $P = 0.014$ ; Post-caring > caring,  $P = 0.018$ . Analyses performed on ln-transformed data ( $-\Delta\Delta C_T$ ). TATA-binding protein was used as an endogenous control, with 3 technical replicates and 10 biological replicates per gene and treatment. The pre-caring state was used as the baseline expression state.

### Biparental Treatments

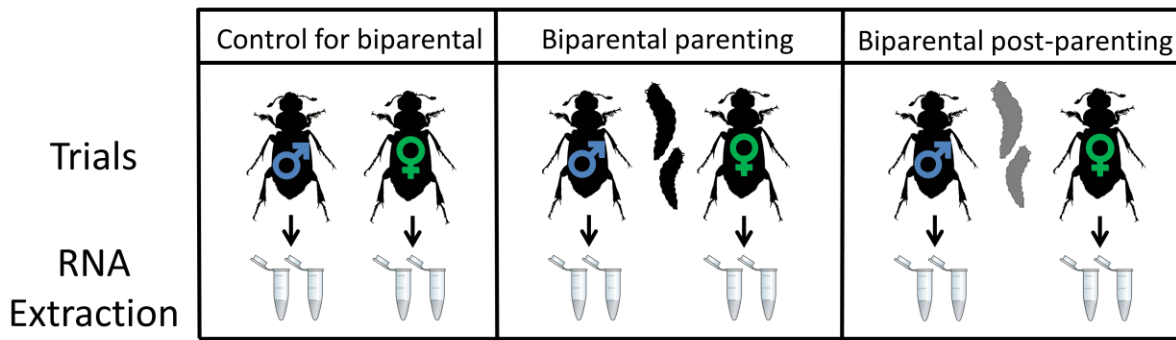

### Uniparental Treatments

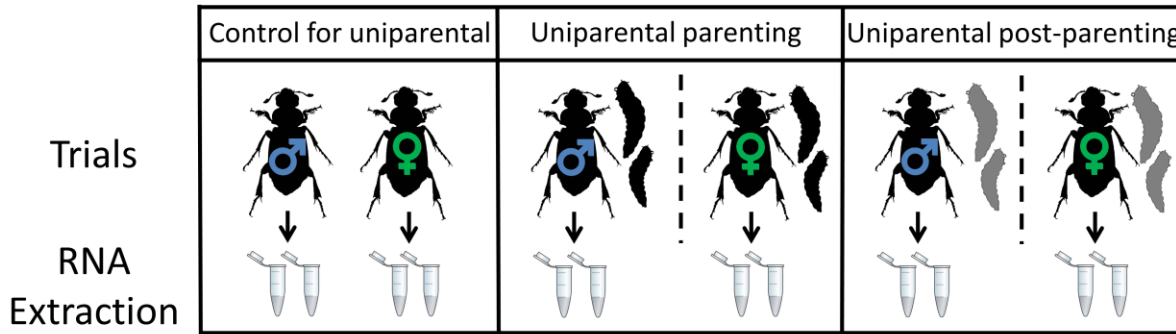

**Supplementary Figure 13** | Outline of sample generation for transcriptomic analyses. Each beetle represents 20 individuals. These produced two biological replicate samples as the brains from 10 individuals were pooled for RNA extraction (represented by a microcentrifuge tube). Black larvae represent the presence of larvae, grey larvae represent larvae that have deserted. Beetle pairs were raised in 6 conditions: In both controls a male and female were allowed to mate but not provided with a mouse carcass and thus were unable to lay eggs and provide care. For the biparental parenting treatment a male and female pair were allowed to mate in the presence of a mouse carcass and allowed to reproduce and provide parental care. Biparental post-parenting samples were generated in the same way as parenting individuals, except they were collected after larvae had deserted. Uniparental parenting and post parenting samples were generated in the same way as biparental samples except one mate was removed post-pairing to leave the remaining mate in a uniparental condition

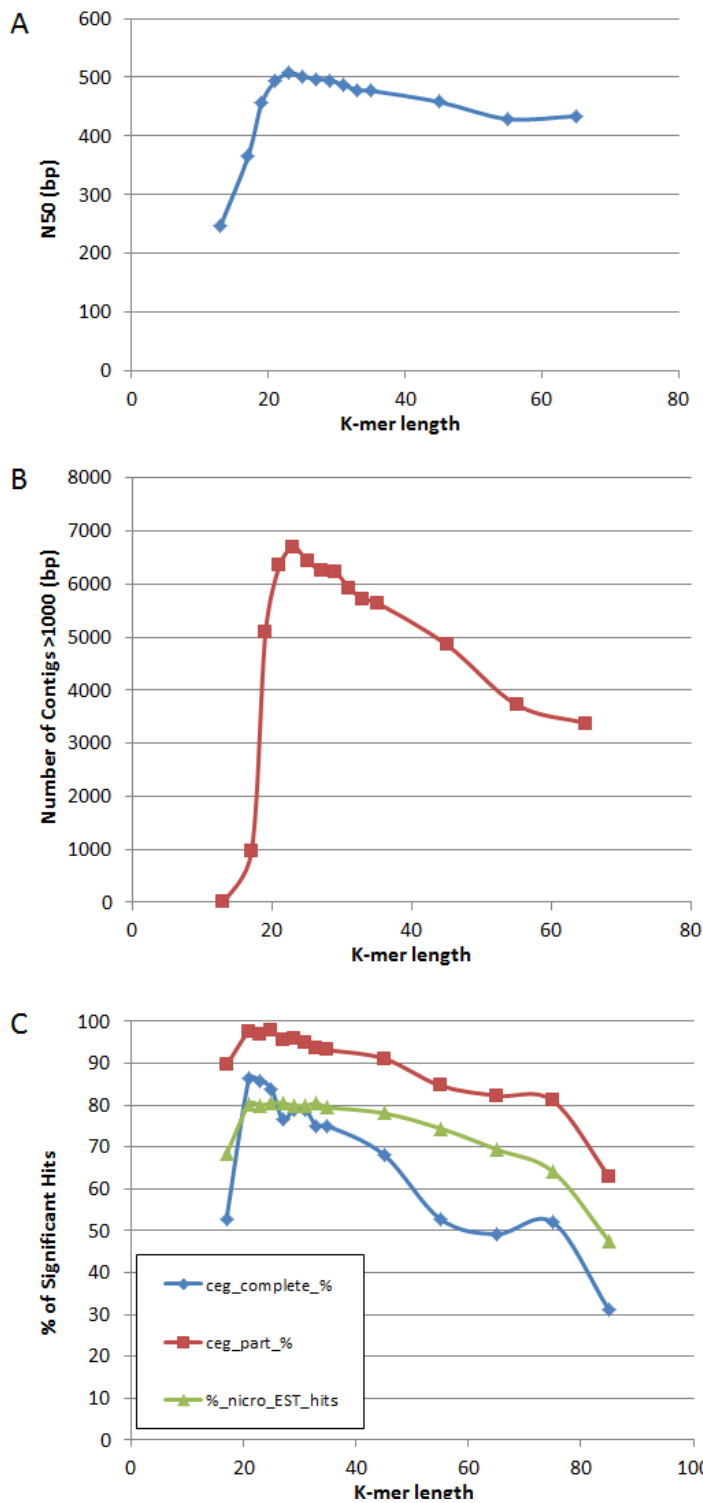

**Supplementary Figure 14 | Assembly metrics for different k-mer lengths.** A. N50 B. the number of contigs over 1000bp in the assembly C. Percentage of ‘core eukaryotic genes’ (both complete and partial) present in the assembly identified using the CEGMA pipeline<sup>2</sup> and the percentage of *Nicrophorus vespilloides* ESTs that had a significant blast hit in the assembly. ceg= core eukaryotic genes, micro= *Nicrophorus vespilloides*, EST= expressed sequence tags, bp = base pairs

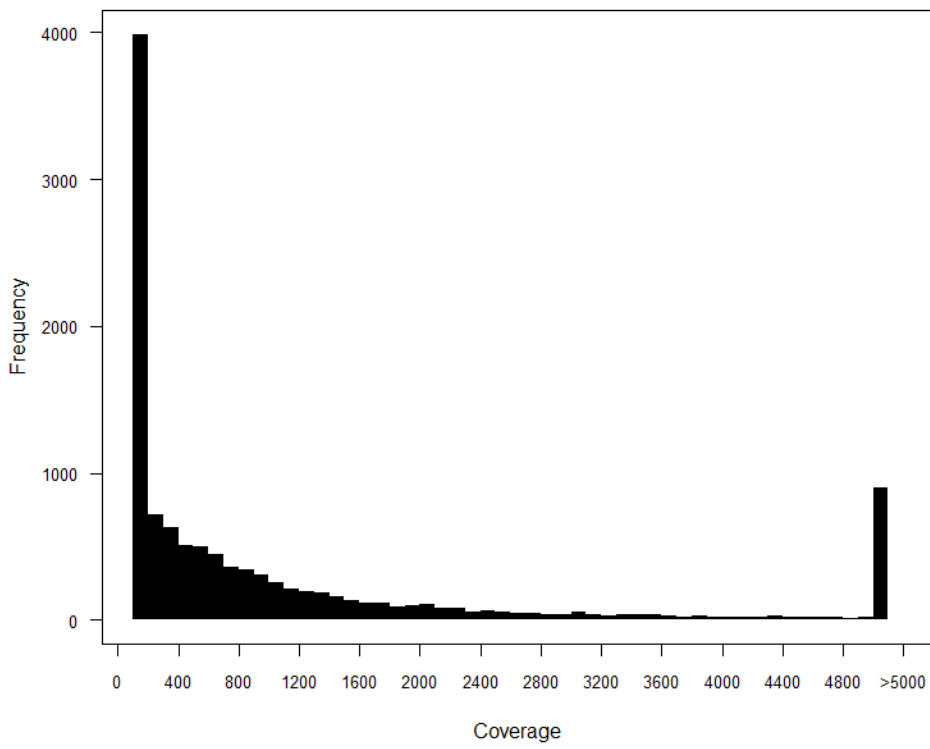

**Supplementary Figure 15 | Mapping statistics.** Mean coverage per scaffold for the reference assembly

**Supplementary Table 1:** The number of differentially expressed genes in the caring gene set in caring vs. control and post-caring vs. control comparisons using the “extended reference assembly”.

| Comparison              | Parenting type | Males | Females |
|-------------------------|----------------|-------|---------|
| Caring vs. control      | Biparental     | 30    | 776     |
|                         | Uniparental    | 403   | 995     |
| Post-caring vs. control | Biparental     | 28    | 42      |
|                         | Uniparental    | 27    | 22      |

**Supplementary Table 2 |** The effect of sex, parental type, and caring state on gene expression change in the caring gene set when using the “extended reference assembly”.

| Variable                 | DF    | Sum Sq | Mean Sq | F       | <i>p</i>              |
|--------------------------|-------|--------|---------|---------|-----------------------|
| Sex                      | 1     | 433    | 433.4   | 305.457 | $< 2 \times 10^{-16}$ |
| Uniparental/Biparental   | 1     | 7      | 6.6     | 4.675   | 0.0306                |
| Caring/Non-caring        | 1     | 1002   | 1002.4  | 706.461 | $< 2 \times 10^{-16}$ |
| Sex * Parenting          | 1     | 28     | 27.6    | 19.444  | $1.04 \times 10^{-5}$ |
| Sex * Caring             | 1     | 223    | 222.7   | 156.985 | $< 2 \times 10^{-16}$ |
| Parenting * Caring       | 1     | 110    | 110.1   | 77.568  | $< 2 \times 10^{-16}$ |
| Sex * Parenting * Caring | 1     | 8      | 7.5     | 5.301   | 0.0213                |
| Residual                 | 13176 | 18695  | 1.4     |         |                       |



**Supplementary Table 3 | Significantly enriched GO-terms in the caring gene set**

| <b>GO-ID</b>      | <b>Term</b>                                                                                           | <b>FDR</b>               |
|-------------------|-------------------------------------------------------------------------------------------------------|--------------------------|
| <b>GO:0006874</b> | cellular calcium ion homeostasis                                                                      | 6.59 x 10 <sup>-10</sup> |
| <b>GO:0005219</b> | ryanodine-sensitive calcium-release channel activity                                                  | 1.28 x 10 <sup>-09</sup> |
| <b>GO:0005319</b> | lipid transporter activity                                                                            | 1.64 x10 <sup>-07</sup>  |
| <b>GO:0006869</b> | lipid transport                                                                                       | 3.80 x10 <sup>-06</sup>  |
| <b>GO:0055114</b> | oxidation-reduction process                                                                           | 6.55 x10 <sup>-06</sup>  |
| <b>GO:0070588</b> | calcium ion transmembrane transport                                                                   | 8.37 x10 <sup>-06</sup>  |
| <b>GO:0016705</b> | oxidoreductase activity, acting on paired donors, with incorporation or reduction of molecular oxygen | 4.98 x10 <sup>-05</sup>  |
| <b>GO:0020037</b> | heme binding                                                                                          | 0.0001                   |
| <b>GO:0004252</b> | serine-type endopeptidase activity                                                                    | 0.0004                   |
| <b>GO:0005549</b> | odorant binding                                                                                       | 0.0011                   |
| <b>GO:0042302</b> | structural constituent of cuticle                                                                     | 0.0014                   |
| <b>GO:0005506</b> | iron ion binding                                                                                      | 0.0017                   |
| <b>GO:0005089</b> | Rho guanyl-nucleotide exchange factor activity                                                        | 0.0026                   |
| <b>GO:0016849</b> | phosphorus-oxygen lyase activity                                                                      | 0.0028                   |
| <b>GO:0035023</b> | regulation of Rho protein signal transduction                                                         | 0.0031                   |
| <b>GO:0009190</b> | cyclic nucleotide biosynthetic process                                                                | 0.0050                   |
| <b>GO:0007601</b> | visual perception                                                                                     | 0.0074                   |
| <b>GO:0019202</b> | amino acid kinase activity                                                                            | 0.0074                   |
| <b>GO:0016297</b> | acyl-[acyl-carrier-protein] hydrolase activity                                                        | 0.0074                   |
| <b>GO:0080019</b> | fatty-acyl-CoA reductase (alcohol-forming) activity                                                   | 0.0143                   |
| <b>GO:0018298</b> | protein-chromophore linkage                                                                           | 0.0185                   |
| <b>GO:0016459</b> | myosin complex                                                                                        | 0.0286                   |
| <b>GO:0006026</b> | aminoglycan catabolic process                                                                         | 0.0323                   |

**Supplementary Table 4.** Assembly and mapping statistics for *de novo* assembly (k=25) before (Raw assembly) and after filtering scaffolds for contamination (scaffolds that blasted to non-arthropod) or those that did not produce a significant blast hit (E-value > 0.001) to produce the reference assembly. Contig N50 and scaffold N50 were obtained using assemblethon<sup>3</sup>.

| Assembly           | Total read pairs mapped (% of raw reads) | Size of transcriptome (bp) | mean coverage | Contig N50 | scaffold N50 | N scaffolds |
|--------------------|------------------------------------------|----------------------------|---------------|------------|--------------|-------------|
| Raw assembly       | 455949577 (63.9)                         | 53919962                   | 1522          | 1299       | 1884         | 48296       |
| Reference assembly | 430998221 (60.4)                         | 35402209                   | 2191          | 2110       | 2979         | 17019       |

**Supplementary Table 5** Results from the CEGMA pipeline<sup>2</sup> for the reference assembly. Prots = number of 248 ultra-conserved CEGs (Core Eukaryotic Genes) present in genome, % Completeness = percentage of 248 ultra-conserved CEGs present, Total = total number of CEGs present including putative orthologs, Average = average number of orthologs per CEG, % Ortho = percentage of detected CEGs that have more than 1 ortholog.

|                 | #Prots | %Completeness | #Total | Average | %Ortho |
|-----------------|--------|---------------|--------|---------|--------|
| <b>Complete</b> | 204    | 82.26         | 467    | 2.29    | 68.63  |
| <b>Group 1</b>  | 49     | 74.24         | 123    | 2.51    | 75.51  |
| <b>Group 2</b>  | 48     | 85.71         | 105    | 2.19    | 68.75  |
| <b>Group 3</b>  | 54     | 88.52         | 126    | 2.33    | 72.22  |
| <b>Group 4</b>  | 53     | 81.54         | 113    | 2.13    | 58.49  |
| <b>Partial</b>  | 238    | 95.97         | 579    | 2.43    | 71.01  |
| <b>Group 1</b>  | 63     | 95.45         | 166    | 2.63    | 79.37  |
| <b>Group 2</b>  | 52     | 92.86         | 127    | 2.44    | 71.15  |
| <b>Group 3</b>  | 59     | 96.72         | 140    | 2.37    | 69.49  |
| <b>Group 4</b>  | 64     | 98.46         | 146    | 2.28    | 64.06  |

**Supplementary Table 6** | Number of reads passing quality control (QC, quality trimming, removal of read pairs with adaptor sequences, removal of read pairs with reads <85bp) and number of reads mapping to reference assembly for each library.

| Library number | Condition                  | sex    | replicate | Raw Read pairs | Read pairs kept after QC | Read pairs kept after QC (%) | Read pairs mapped | Read pairs mapped (%) |
|----------------|----------------------------|--------|-----------|----------------|--------------------------|------------------------------|-------------------|-----------------------|
| 1              | control for biparental     | Female | 1         | 27198698       | 27186876                 | 99.96                        | 17729537          | 65.21                 |
| 2              | control for biparental     | Female | 2         | 26685779       | 26664998                 | 99.92                        | 18156673          | 68.09                 |
| 3              | control for uniparental    | Female | 1         | 30151331       | 29717574                 | 98.56                        | 19182562          | 64.55                 |
| 4              | control for uniparental    | Female | 2         | 30661662       | 30490233                 | 99.44                        | 20235243          | 66.37                 |
| 5              | control for biparental     | Male   | 1         | 26307789       | 26291008                 | 99.94                        | 15660692          | 59.57                 |
| 6              | control for biparental     | Male   | 2         | 25595478       | 25569149                 | 99.90                        | 14966333          | 58.53                 |
| 7              | control for uniparental    | Male   | 1         | 29028894       | 28652974                 | 98.71                        | 17340698          | 60.52                 |
| 8              | control for uniparental    | Male   | 2         | 30118973       | 29821098                 | 99.01                        | 18434455          | 61.82                 |
| 9              | Biparental parenting       | Female | 1         | 25580525       | 25556902                 | 99.91                        | 14647691          | 57.31                 |
| 10             | Biparental parenting       | Female | 2         | 27398893       | 27387771                 | 99.96                        | 15821030          | 57.77                 |
| 11             | Uniparental parenting      | Female | 1         | 27370110       | 27170276                 | 99.27                        | 16131079          | 59.37                 |
| 12             | Uniparental parenting      | Female | 2         | 35697769       | 35404437                 | 99.18                        | 21259071          | 60.05                 |
| 13             | Biparental parenting       | Male   | 1         | 26725766       | 26702193                 | 99.91                        | 15457885          | 57.89                 |
| 14             | Biparental parenting       | Male   | 2         | 26889467       | 26874825                 | 99.95                        | 15423028          | 57.39                 |
| 15             | Uniparental parenting      | Male   | 1         | 39424372       | 39082745                 | 99.13                        | 23406818          | 59.89                 |
| 16             | Uniparental parenting      | Male   | 2         | 40309706       | 39929606                 | 99.06                        | 23906173          | 59.87                 |
| 17             | Biparental post-parenting  | Female | 1         | 26170752       | 26142024                 | 99.89                        | 15583397          | 59.61                 |
| 18             | Biparental post-parenting  | Female | 2         | 25839070       | 25822740                 | 99.94                        | 15024559          | 58.18                 |
| 19             | Uniparental post-parenting | Female | 1         | 36592277       | 36122310                 | 98.72                        | 23129177          | 64.03                 |
| 20             | Uniparental post-parenting | Female | 2         | 31682815       | 31210473                 | 98.51                        | 19963728          | 63.96                 |
| 21             | Biparental post-parenting  | Male   | 1         | 25588907       | 25563130                 | 99.90                        | 14776987          | 57.81                 |
| 22             | Biparental post-parenting  | Male   | 2         | 26336968       | 26317536                 | 99.93                        | 15136007          | 57.51                 |
| 23             | Uniparental post-parenting | Male   | 1         | 35926096       | 34991857                 | 97.40                        | 20808150          | 59.47                 |
| 24             | Uniparental post-parenting | Male   | 2         | 30647493       | 30472720                 | 99.43                        | 18817248          | 61.75                 |

**Supplemental Table 7.** Design matrix for the GLM used to identify DE genes. White columns - Sample information including factors Sex, Behavioural state, and Parental type provided to EdgeR. Grey columns = design matrix used in EdgeR to perform GLM and produce the contrasts listed in the main text. For more detailed information on the use of design matrix to perform contrasts see<sup>4</sup>.

| Group                             | Replicate | Sex    | behavioural state | Parental type | Sex | Parenting | Post-parenting | Parental type | Sex: Parenting | Sex: Post-parenting | Sex: Parental Type | Parenting: Parental type | Post-parenting: Parental Type | Sex: Parenting: Parental | Sex: Post-parenting: Parental type |
|-----------------------------------|-----------|--------|-------------------|---------------|-----|-----------|----------------|---------------|----------------|---------------------|--------------------|--------------------------|-------------------------------|--------------------------|------------------------------------|
| biparental female parenting       | 1         | female | parenting         | biparental    | 0   | 1         | 0              | 0             | 0              | 0                   | 0                  | 0                        | 0                             | 0                        | 0                                  |
| biparental female parenting       | 2         | female | parenting         | biparental    | 0   | 1         | 0              | 0             | 0              | 0                   | 0                  | 0                        | 0                             | 0                        | 0                                  |
| uniparental female parenting      | 1         | female | parenting         | uniparental   | 0   | 1         | 0              | 1             | 0              | 0                   | 0                  | 1                        | 0                             | 0                        | 0                                  |
| uniparental female parenting      | 2         | female | parenting         | uniparental   | 0   | 1         | 0              | 1             | 0              | 0                   | 0                  | 1                        | 0                             | 0                        | 0                                  |
| biparental female control         | 1         | female | control           | biparental    | 0   | 0         | 0              | 0             | 0              | 0                   | 0                  | 0                        | 0                             | 0                        | 0                                  |
| biparental female control         | 2         | female | control           | biparental    | 0   | 0         | 0              | 0             | 0              | 0                   | 0                  | 0                        | 0                             | 0                        | 0                                  |
| uniparental female control        | 1         | female | control           | uniparental   | 0   | 0         | 0              | 1             | 0              | 0                   | 0                  | 0                        | 0                             | 0                        | 0                                  |
| uniparental female control        | 2         | female | control           | uniparental   | 0   | 0         | 0              | 1             | 0              | 0                   | 0                  | 0                        | 0                             | 0                        | 0                                  |
| biparental female post-parenting  | 1         | female | post-parenting    | biparental    | 0   | 0         | 1              | 0             | 0              | 0                   | 0                  | 0                        | 0                             | 0                        | 0                                  |
| biparental female post-parenting  | 2         | female | post-parenting    | biparental    | 0   | 0         | 1              | 0             | 0              | 0                   | 0                  | 0                        | 0                             | 0                        | 0                                  |
| uniparental female post-parenting | 1         | female | post-parenting    | uniparental   | 0   | 0         | 1              | 1             | 0              | 0                   | 0                  | 0                        | 1                             | 0                        | 0                                  |
| uniparental female post-parenting | 2         | female | post-parenting    | uniparental   | 0   | 0         | 1              | 1             | 0              | 0                   | 0                  | 0                        | 1                             | 0                        | 0                                  |
| biparental male parenting         | 1         | male   | parenting         | biparental    | 1   | 1         | 0              | 0             | 1              | 0                   | 0                  | 0                        | 0                             | 0                        | 0                                  |
| biparental male parenting         | 2         | male   | parenting         | biparental    | 1   | 1         | 0              | 0             | 1              | 0                   | 0                  | 0                        | 0                             | 0                        | 0                                  |
| uniparental male parenting        | 1         | male   | parenting         | uniparental   | 1   | 1         | 0              | 1             | 1              | 0                   | 1                  | 1                        | 0                             | 1                        | 0                                  |
| uniparental male parenting        | 2         | male   | parenting         | uniparental   | 1   | 1         | 0              | 1             | 1              | 0                   | 1                  | 1                        | 0                             | 1                        | 0                                  |
| biparental male control           | 1         | male   | control           | biparental    | 1   | 0         | 0              | 0             | 0              | 0                   | 0                  | 0                        | 0                             | 0                        | 0                                  |
| biparental male control           | 2         | male   | control           | biparental    | 1   | 0         | 0              | 0             | 0              | 0                   | 0                  | 0                        | 0                             | 0                        | 0                                  |
| uniparental male control          | 1         | male   | control           | uniparental   | 1   | 0         | 0              | 1             | 0              | 0                   | 1                  | 0                        | 0                             | 0                        | 0                                  |

|                                 |   |      |                |             |   |   |   |   |   |   |   |   |   |   |   |
|---------------------------------|---|------|----------------|-------------|---|---|---|---|---|---|---|---|---|---|---|
| uniparental male control        | 2 | male | control        | uniparental | 1 | 0 | 0 | 1 | 0 | 0 | 1 | 0 | 0 | 0 | 0 |
| biparental male post-parenting  | 1 | male | post-parenting | biparental  | 1 | 0 | 1 | 0 | 0 | 1 | 0 | 0 | 0 | 0 | 0 |
| biparental male post-parenting  | 2 | male | post-parenting | biparental  | 1 | 0 | 1 | 0 | 0 | 1 | 0 | 0 | 0 | 0 | 0 |
| uniparental male post-parenting | 1 | male | post-parenting | uniparental | 1 | 0 | 1 | 1 | 0 | 1 | 1 | 0 | 1 | 0 | 1 |
| uniparental male post-parenting | 2 | male | post-parenting | uniparental | 1 | 0 | 1 | 1 | 0 | 1 | 1 | 0 | 1 | 0 | 1 |

## Supplementary References

1. Roy-Zokan, E. M., Cunningham, C. B., Hebb, L. E., McKinney, E. C. & Moore, A. J. *vitellogenin* and vitellogenin receptor gene expression is associated with male and female parenting in a subsocial insect. *Proc. R. Soc. Lond. B Biol. Sci.* **282**, 20150787 (2015).
2. Parra, G., Bradnam, K. & Korf, I. CEGMA: a pipeline to accurately annotate core genes in eukaryotic genomes. *Bioinformatics* **23**, 1061–1067 (2007).
3. Bradnam, K. R. *et al.* Assemblathon 2: evaluating de novo methods of genome assembly in three vertebrate species. *GigaScience* **2**, 10 (2013).
4. Chen, Y., McCarthy, D., Robinson, M. & Smyth, G. K. *edgeR: differential expression analysis of digital gene expression data User's Guide.* (2015).

<<http://www.bioconductor.org/packages/release/bioc/vignettes/edgeR/inst/doc/edgeRUsersGuide.pdf>>
